# Supplementary material
Source: HighWire-hosted journal article supplement (http://molpharm.aspetjournals.org/highwire/filestream/83647/field_highwire_adjunct_files/0/SupplementaryFigures_114363.pdf)

## SUPPORTING INFORMATION

### Active-site tryptophan, the target of anti-neoplastic CtBP inhibitors, mediates inhibitor disruption of CtBP oligomerization and transcription coregulatory activities

M. Michael Dcona, Priyadarshan K. Damle#, Francisco Zarate-Perez#, Benjamin L. Morris#, Zaid Nawaz, Michael J. Dennis, Xiaoyan Deng, Sudha Korwar, Sahib J. Singh, Keith C. Ellis, William E. Royer, Dipankar Bandyopadhyay, Carlos Escalante, and Steven R. Grossman \*

#### Sections:

1. Extended Figure legends
2. Supplemental figures

#### 1. Extended Figure Legends

**Supplemental Figure-1** AUC sedimentation coefficient distribution of *st.mt*-CtBP2 (27.2  $\mu$ M) in its native form and in the presence of 10  $\mu$ M NAD(H).

**Supplemental Figure-2** AUC sedimentation coefficient distribution of 27.2  $\mu$ M of *st. wt*-CtBP2 in its native form and in the presence of 10  $\mu$ M NAD(H) and varying doses of 4-Cl-HIPP

**Supplemental Figure-3** Densitometry calculation for GST-*wt*-CtPB2 and His-*wt*-CtBP2 and His-G189A-CtBP2.

**Supplemental Figure-4** GST pulldown assay to describe the interaction inhibition between bead immobilized GST-CtBP2 (31-364) and *st. wt*-CtBP2 in the presence of 10  $\mu$ M NAD(H) and increasing concentration of either 4-Cl-HIPP or 4-OMe-HIPP (negative control)

**Supplemental Figure-5** Cartoon representing cross-linking reaction.

**Supplemental Figure-6** Blots representing transfection efficiency of cells transfected with either EV, *wt* or *mt*-CtBP2 for QPCR assay

**Supplemental Figure-7** Blots representing transfection efficiency of cells transfected with either EV, *wt* or *mt*-CtBP2 for migration assay

## 2. Supplemental figures

Supplemental Figure-1

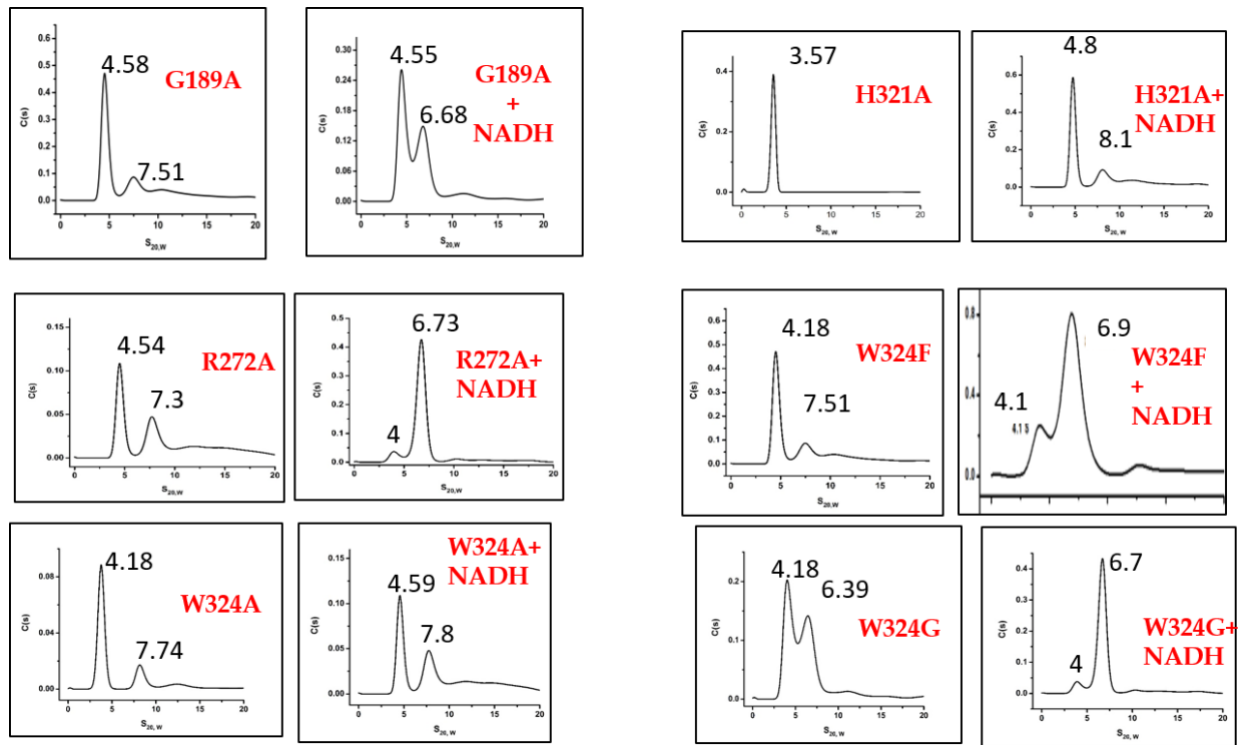

**Supplemental Figure-2**

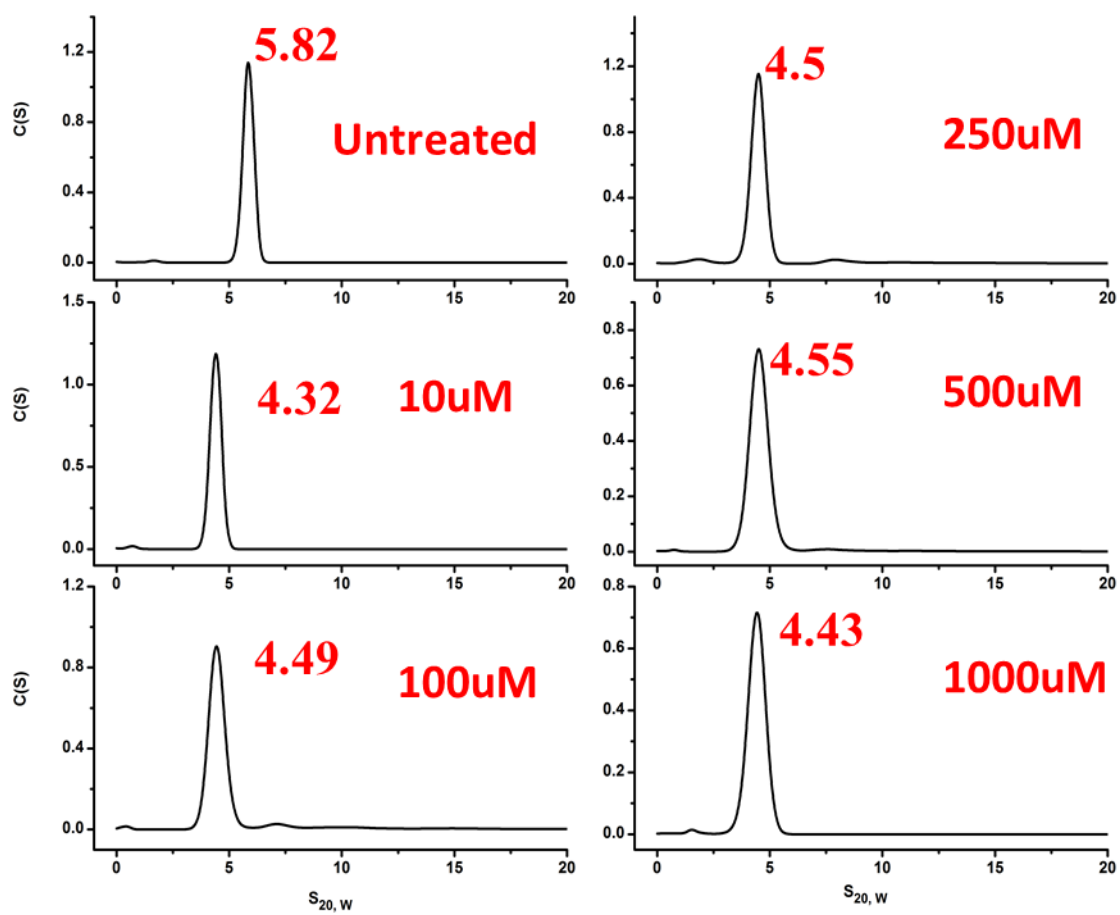

**Supplemental Figure-3** Densitometry calculation for GST-wt-CtPB2 and His-*wt*-CtBP2 and His-*G189A*-CtBP2.

| Absolute density   | GST/His CtBP2-Wt | GST-Wt/ His-G189A |
|--------------------|------------------|-------------------|
|                    | 103              | 30                |
|                    | 171              | 38                |
|                    | 162              | 68                |
|                    | 171              | 69                |
|                    |                  |                   |
| Normalized density | 100              | 29.12             |
|                    | 100              | 22.22             |
|                    | 100              | 41.97             |
|                    | 100              | 40.35             |

Supplemental Figure-4

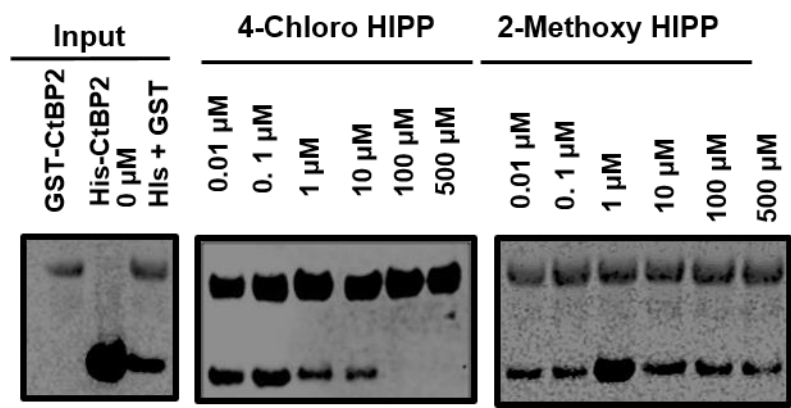

Supplemental Figure-5

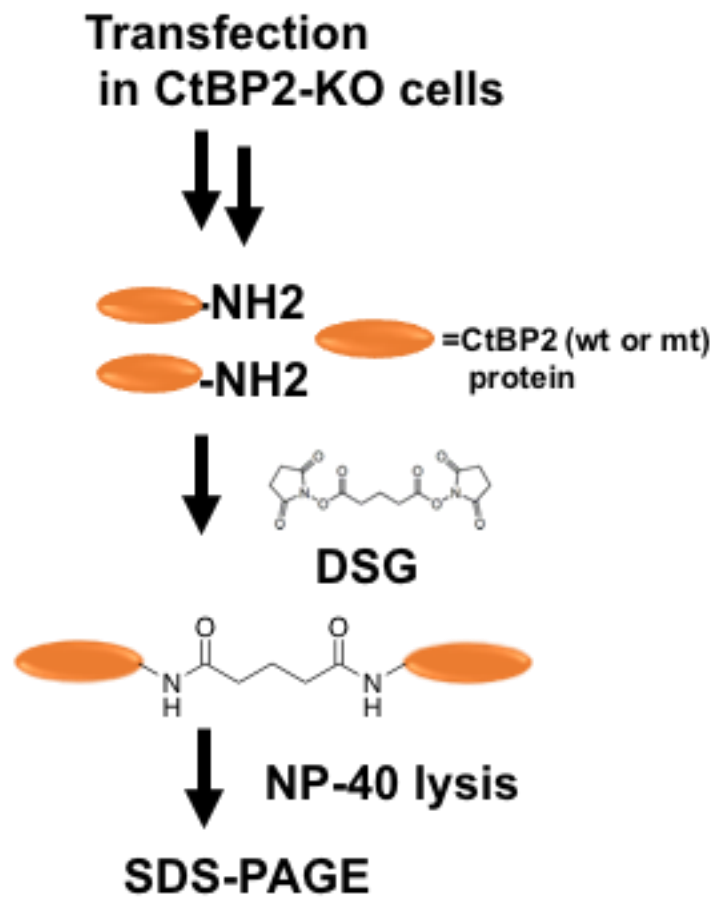

Supplemental Figure-6

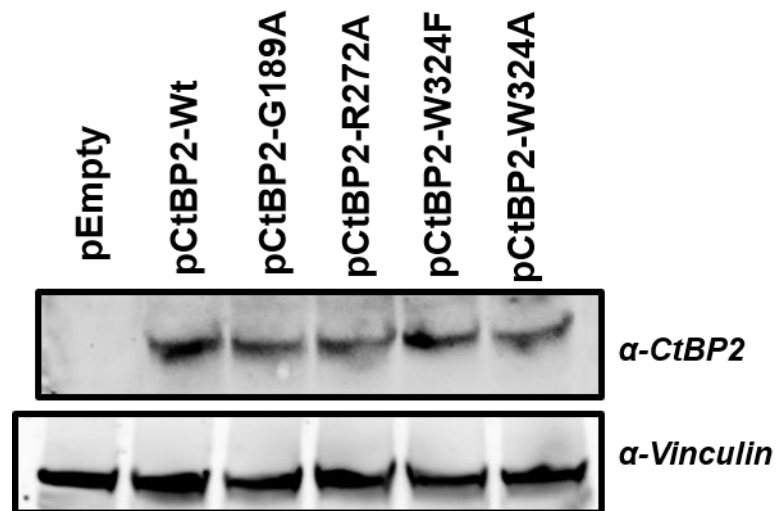

Supplemental Figure-7

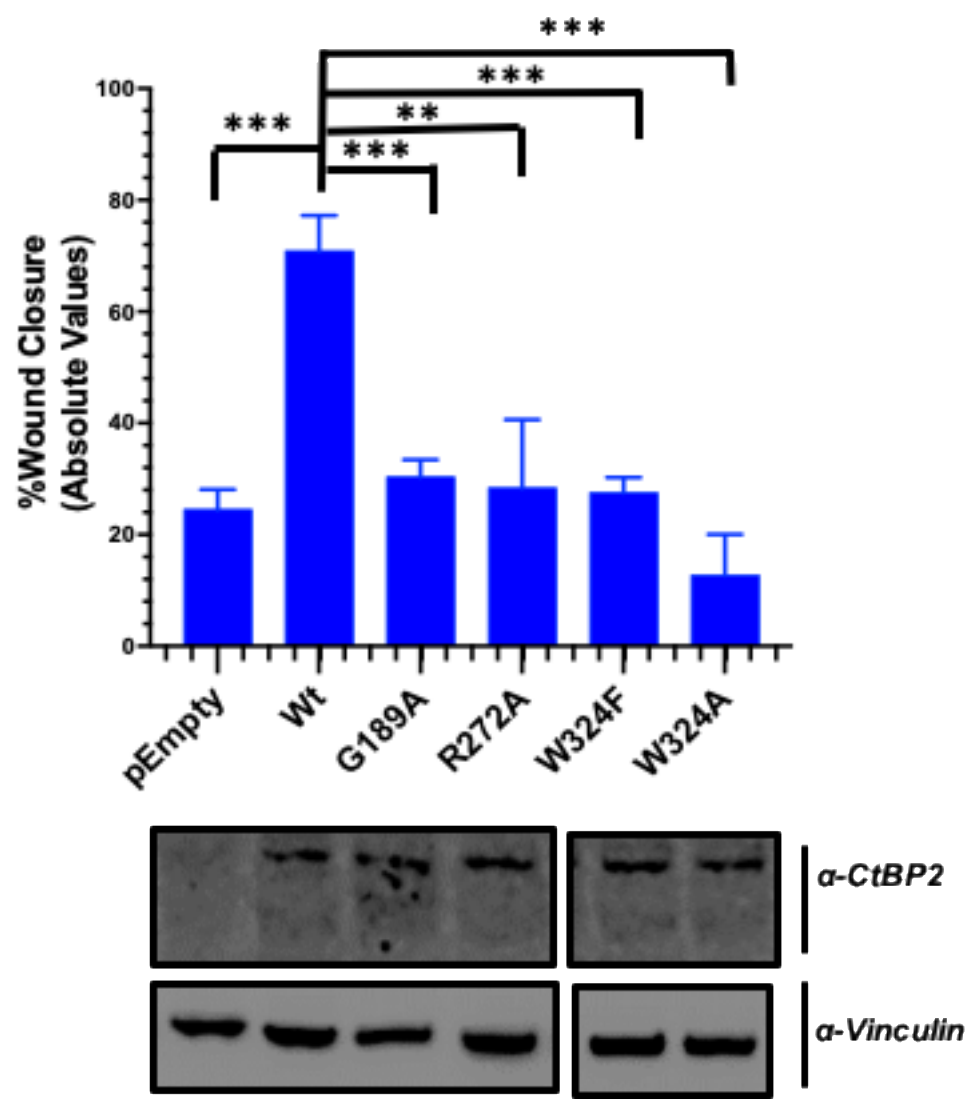

Supplement: SupplementaryFigures_114363.pdf [file SupplementaryFigures_114363.pdf]
